# Supplementary material
Source: HighWire-hosted journal article supplement (https://www.cmajopen.ca/highwire/filestream/88759/field_highwire_adjunct_files/4/open-2021-0257-original-submission.pdf)
Supplement: open-2021-0257-original-submission.pdf [file open-2021-0257-original-submission.pdf]

1  
2 PRESENCE OF CHRONIC DISEASES AND COMPLIANCE WITH QUÉBEC PROVINCIAL GUIDELINES FOR  
3  
4 OUTPATIENT ANTIBIOTIC PRESCRIPTION IN CASES OF RESPIRATORY INFECTIONS, AN OPEN COHORT STUDY IN  
5  
6 QUÉBEC, CANADA, 2010-2017  
7  
8  
9

10 Élise Fortin<sup>1,2,3</sup>, Geneviève Deceuninck<sup>1</sup>, Caroline Sirois<sup>1,3,4</sup>, Caroline Quach<sup>2</sup>, Marc Simard<sup>1,3</sup>, Marc Dionne<sup>1</sup>,  
11  
12 Sonia Jean<sup>1,5</sup>, Alejandra Irace-Cima<sup>1</sup>, Nadine Magali-Ufitinema<sup>6</sup>  
13

- 14 1. Institut national de santé publique du Québec, Québec, Canada
- 15  
16 2. Department of Microbiology, Infectious Diseases and Immunology, Faculty of Medicine, University of  
17  
18 Montreal, Québec, Canada
- 19  
20 3. Department of Social and Preventive Medicine, Faculty of Medicine, Laval University, Québec, Canada
- 21  
22 4. Centre d'excellence sur le vieillissement de Québec, Centre de recherche du CHU de Québec, Québec,  
23  
24 Canada
- 25  
26 5. Department of Medicine, Faculty of Medicine, Laval University, Québec, Canada
- 27  
28 6. Direction de la prévention et du contrôle des maladies infectieuses, Direction générale adjointe de la  
29  
30 protection de la santé publique, Ministère de la Santé et des Services sociaux  
31  
32  
33  
34  
35

36 Corresponding author:

37 Élise Fortin

38 Institut national de santé publique du Québec,

39  
40 2400, Avenue D'Estimauville, 3e étage

41  
42 Québec, Québec G1E 7G9

43  
44 Phone: 1-418-650-5115 #6319

45  
46 Email: [elise.fortin@inspq.qc.ca](mailto:elise.fortin@inspq.qc.ca)

47  
48 ORCID: 0000-0001-6612-9091  
49  
50  
51  
52  
53

54 Abstract word count: 249 words

55 Main text word count: 2256 words  
56  
57

1  
2  
3  
4  
5  
6  
7  
8  
9  
10  
11  
12  
13  
14  
15  
16  
17  
18  
19  
20  
21  
22  
23  
24  
25  
26  
27  
28  
29  
30  
31  
32  
33  
34  
35  
36  
37  
38  
39  
40  
41  
42  
43  
44  
45  
46  
47  
48  
49  
50  
51  
52  
53  
54  
55  
56  
57  
58  
59  
60

**Funding.** This work was supported by the *Ministère de la Santé et des services sociaux du Québec*. Publication in this journal was supported by a dissemination grant from the Canadian Institutes of Health Research (Institute of Infection and Immunity).

**Transparency declarations.** All authors report no conflicts of interest relevant to this article.

**Data sharing.** Data used for this study cannot be shared.

Confidential

## Abstract

**Objectives.** In Québec, antibiotic use is higher in outpatients with chronic diseases, but it is unclear whether it may be improved. We aimed to measure the proportion of prescriptions compliant with provincial guidelines for the treatment of common respiratory infections and measure variations in this proportion with certain chronic diseases.

**Methods.** Antibiotic dispensing covered by the public drug insurance plan between April 2010 and March 2017, delivered within 2 days of an outpatient consultation for an infection was included. Infections targeted by provincial guidelines were studied: bronchitis in patients with chronic obstructive pulmonary disease, otitis media, pharyngitis, pneumonia and sinusitis. Proportions of prescriptions compliant with guidelines (antibiotic choice for children, and antibiotic choice and dosage for adults) were computed by age (children or adults) and chronic disease (respiratory, cardiovascular, diabetes, mental disorder, none of previous). The impact of chronic diseases on compliance was measured using robust Poisson regression.

**Results.** Between 14,677 and 198,902 prescriptions were included, for each infection. Compliance was above 87% in children,  $\leq 3\%$  lower in children with asthma. In adults, the choice of agent was compliant for at least 73% of prescriptions, except for pharyngitis ( $\leq 61\%$ ). Accounting for dosage lowered compliance (between 31% and 61%). Compliant prescriptions were 2% to 6% less frequent in the presence of chronic diseases.

**Conclusions.** Non-compliant prescriptions could sometimes be appropriate, but their high frequency suggests room for improvement. Because variations associated with chronic diseases were small, disease-specific guidelines for antibiotic prescriptions are likely to have a limited impact on compliance.

Keywords: surveillance; public health; antimicrobial use; chronic diseases

## Introduction

Antimicrobial resistance is of concern to public health authorities worldwide (1–5). As the frequency of multidrug resistant bacteria increases, with very few new antimicrobials developed, therapeutic options become more limited. This has led the World Health Organization to place antimicrobial resistance among its top ten list of global health issues(6). Antimicrobial use, especially inappropriate use, is the main modifiable determinant of resistance, because of how it selects resistant strains. While utilization is more intense in hospitals, most antimicrobial prescriptions arise in the community(7). In Québec, hospitals are expected to have an antimicrobial stewardship program(8,9), however, in the community, the main tools to support adequate use of antimicrobials are the provincial clinical guidelines developed by the Institut national d'excellence en santé et services sociaux (INESSS) for the treatment of the most common infections(10).

Quebec's rates of antimicrobial use in the community are among the lowest in Canada and compare advantageously to those of a majority of European countries(7,11). It is unclear whether this utilization may be further reduced, however, we have observed higher rates of antibiotic use in outpatients with chronic diseases than in patients without these diseases (manuscript currently submitted to CMAJ Open). As this might be an opportunity for intervention, we aimed to measure the proportion of antibiotic prescriptions compliant with provincial guidelines for the treatment of common respiratory infections, and to quantify variations in this proportion in the presence of certain chronic diseases.

## Methods

### *Study design and population*

This was a retrospective study of antibiotic prescriptions delivered to individuals covered by the province of Quebec's public drug insurance plan between April 1<sup>st</sup>, 2010 and March 31<sup>st</sup>, 2017, and who had consulted a physician in a primary care medical service in the previous two days for a common respiratory infection. We used this very short delay between medical visits and antibiotic delivery to minimize the risk of imputing the wrong treatment indication if antibiotics were actually prescribed for another indication that was not reported.

1 Only antibacterials for systemic use (class J01 of the ATC classification system) were included in the study(12).  
2  
3  
4 Ten open cohorts were created, i.e. one cohort for each age group (children and adults) and infection: otitis  
5  
6 media (only children), chronic obstructive pulmonary disease (COPD) exacerbations and bronchitis (only adults  
7  
8 with COPD), pharyngitis, pneumonia, sinusitis, and upper respiratory tract infections (URTI). Medical visits  
9  
10 occurring less than 90 days after a visit for a similar infection were excluded. URTI were excluded when a  
11  
12 medical visit for a bacterial infection had also occurred in the previous or following week. The 2009 guidelines  
13  
14 were applicable for most of the study period and although many new guidelines were issued in 2016, as we  
15  
16 assumed that the uptake was not immediate, only 2009 guidelines are used as reference in the analysis.  
17  
18

### 19 *Data sources and variables*

20  
21  
22 The Québec Integrated Chronic Disease Surveillance System (QICDSS) links information from five  
23  
24 administrative health databases: the health insurance registry, hospital discharges, vital statistics death registry,  
25  
26 physician claims, and pharmaceutical services(13). We used data from the QICDSS to identify individuals  
27  
28 covered by the public drug insurance plan and their medical visits for respiratory infections (based on the 9<sup>th</sup>  
29  
30 edition of the International Classification of Diseases, see detailed codes in Table 1), antibiotic prescriptions  
31  
32 delivered to these individuals (antibiotic chosen and, for oral prescriptions delivered to adults, the total dosage),  
33  
34 and individuals with chronic diseases. Chronic diseases were grouped into five categories: chronic respiratory  
35  
36 diseases (asthma or COPD), diabetes, cardiovascular diseases (hypertension, heart failure and ischemic heart  
37  
38 disease), mental disorders (for instance, attention deficit disorder, schizophrenia, anxiety disorders or  
39  
40 Alzheimer's disease) and none of these chronic diseases. Other variables collected were year of prescription  
41  
42 (financial years starting in April and ending in March), patient's age group (1-4, 5-9, 10-17, 18-29, 30-39, 40-49,  
43  
44 50-64, 65-69, 70-79 and 80 years old or over), sex, geographical zone (four category-gradient from urban to  
45  
46 rural) and quintiles of social and material deprivation indexes. The use of QICDSS for surveillance purposes has  
47  
48 been approved by the government bodies, the Public Health Ethics Committee and the *Commission d'accès à*  
49  
50 *l'information du Québec*.  
51  
52  
53  
54  
55  
56  
57  
58  
59  
60

1  
2 For prescriptions following a visit for a respiratory infection, compliance with INESSS' 2009 clinical guidelines  
3 was assessed based on the type of infection, the antibiotic prescribed and, for adults only, the total dosage  
4 delivered at the pharmacy(10). The total dosage had to be within the minimal and maximal limits recommended  
5 in the guidelines. In the case of URTI, which is usually viral and for which no antibiotic prescription is  
6 recommended and therefore no provincial guideline exists, any antibiotic prescription was considered discordant  
7 with recommendations; this is why medical visits for URTI were excluded when a visit for a bacterial infection  
8 was also reported in the same week, in order to minimize the risk of imputing the wrong treatment indication.  
9

### 10 11 12 13 14 15 16 17 18 *Statistical analyses*

19  
20 The impact of the presence of chronic diseases on the proportion of compliant prescriptions was measured using  
21 robust Poisson regression, while adjusting for year, age group, sex, geographical zone and quintiles of  
22 deprivation. Generalized estimating equations were used to account for correlation between prescriptions for a  
23 given patient or issued by the same prescriber. A separate analysis was performed for each of the ten cohorts.  
24  
25  
26  
27  
28  
29

### 30 **Results**

31  
32  
33 Between April 2010 and March 2017, a total of 424,148 prescriptions were delivered to children covered by the  
34 public drug insurance plan for either otitis, pharyngitis, pneumonia, sinusitis or URTI. These prescriptions are  
35 described in Table 2. Prescribed antibiotics were usually among the recommended options, as compliance was at  
36 least 87% for all infections and categories of chronic diseases. Of note, in the treatment of otitis media,  
37 clarithromycin, azithromycin or cefprozil were used in 32% of cases, despite being recommended only in case of  
38 an allergy to penicillin. The presence of asthma was always associated with a lower compliance, however, this  
39 variation was small (3% less compliant at most, for the treatment of sinusitis in patients with a respiratory  
40 disease). A total of 70,064 antibiotic prescriptions delivered for a URTI were identified.  
41  
42  
43  
44  
45  
46  
47  
48  
49  
50

51 A total of 697,543 prescriptions were delivered to adults covered by the public drug insurance plan for either  
52 COPD exacerbation or bronchitis, pharyngitis, pneumonia, sinusitis or URTI (described in Table 3). Throughout  
53 the study period, 175,107 prescriptions following a medical visit for a URTI were found. In patients with none of  
54  
55  
56  
57

1 the studied chronic diseases, the antibiotic choice was compliant with guidelines in 64% of prescriptions for a  
2 pharyngitis, 84% of prescriptions for pneumonia and 86% of prescriptions for sinusitis. The lower compliance  
3 for pharyngitis was due to the frequent use of amoxicillin, which was not recommended until the 2016  
4 guidelines, but was prescribed in 24% of cases nonetheless. Compliance was excellent for patients with COPD  
5 exacerbations and bronchitis, at 95%. For all infections, when accounting for the total dose served to patients,  
6 compliance decreased markedly, and more importantly in cases of more severe infections (COPD exacerbations  
7 [33%] and pneumonia [40%]). In the presence of chronic diseases, compliance was reduced by 6% at most. The  
8 majority of non-compliant dosages were higher than what was recommended in the guides (up to 59% of  
9 prescriptions against COPD exacerbations and bronchitis for which the chosen antibiotic was compliant), except  
10 for the treatment of pneumonia, for which dosages were too low or too high in similar proportions.  
11  
12  
13  
14  
15  
16  
17  
18  
19  
20  
21  
22  
23

## 24 **Interpretation**

25  
26  
27 Between April 2010 and March 2017, antibiotic prescriptions issued to individuals covered by the public drug  
28 insurance plan were compliant (recommended antibiotic) with provincial guidelines at least 87% of the time in  
29 children, but much less frequently in adults, reaching a low of 53% for the choice of antibiotic for pharyngitis in  
30 individuals with diabetes. Compliance was lower when dosage was accounted for, varying between 31% and  
31 61% depending on the infection and the presence of certain chronic diseases. Most discordant dosages were  
32 higher than recommended. Chronic diseases were systematically associated with lower compliance in both  
33 children and adults, but more in adults, for whom dosage was also considered. The lower compliance associated  
34 with chronic diseases was however very limited (relative reduction of 6% at most), revealing that the global low  
35 compliance levels in adults are not driven by prescribing for patients with chronic diseases.  
36  
37  
38  
39  
40  
41  
42  
43  
44  
45  
46  
47

48 A higher risk of exposure to inappropriate antibiotic use in the presence of certain chronic diseases has also been  
49 observed in a British study(14). In children, a Charlson index of 3 or 4 was associated with more inappropriate  
50 use (odds ratio = 1.34), while in adults, the presence of comorbidities increased the odds of inappropriate  
51 prescriptions against URTI, lower respiratory tract infections and sinusitis (odds ratios of 1.20, 1.19 and 1.12,  
52 respectively). As inappropriate use is relatively frequent, the odds ratios are not equivalent to our proportion  
53  
54  
55  
56  
57  
58  
59  
60

1 ratios presented in Tables 2 and 3, but the associations remain. Also, the QICDSS uses sensitive algorithms to  
2 identify chronic diseases without distinguishing between early and advanced stages, which might lead to lower  
3 associations between chronic diseases and antibiotic use. For instance, based on our data, mental disorders  
4 appear quite frequent in children, but the definition includes attention deficit disorders, which is very different  
5 from adults' Alzheimer's disease in terms of medication and vulnerability. The need to add an antibiotic to  
6 regular medication taken for the management of a chronic illness may make the choice of antibiotic more  
7 challenging, given the risk of drug interactions; this complexity is likely to increase with the number of  
8 diseases(15). Indeed, in another study on the treatment of urinary tract infections, the cumulation of chronic  
9 diseases in an individual increased the risk of receiving a non-compliant prescription by up to 12% for patients  
10 with four chronic conditions(16). In these cases, not following guidelines can be the appropriate line of conduct  
11 to prevent drug interactions, but resources should be available to support primary care physicians.

27 With our methodology, we do not know whether non-compliance was appropriate or justifiable, especially as  
28 chronic diseases seem to explain only a small fraction of discordances. We have not looked at the potential  
29 impact of obesity, which could explain at least some of the excessive dosages given the high prevalence of  
30 obesity in Québec (25% of the adult population in 2018)(17). The absence of a reliable treatment duration in our  
31 data sources makes it impossible to identify suboptimal doses for long treatment durations or large doses given  
32 over a short period, for example. From an antimicrobial resistance point of view, suboptimal doses and longer  
33 treatment durations are more problematic as they could lead more efficiently to selection of resistant  
34 strains(18,19). This would have to be investigated with another methodology. Also, non-recommended  
35 antibiotics were frequently prescribed (especially in adults), which is less understandable than a non-compliant  
36 dosage. The probability of selecting one of the recommended agents was proportional to the number of  
37 antibiotics recommended in the guidelines for a given condition (five for pharyngitis treatment versus ten for  
38 bronchitis and COPD exacerbations treatment, with sinusitis and pneumonia in the middle(10)). In the specific  
39 case of pharyngitis, however, practices might have been influenced by American guidelines, which include  
40 amoxicillin since 1997(20,21). Important levels of inappropriate use are reported in the literature, according to  
41 different methodologies(22–24). Also, a Québec study similar to ours reported that the proportion of viral



1  
2 respiratory infections treated with antibiotics varied between 22% and 43% depending on the infection; two  
3  
4 decades later, we still found thousands of antibiotic prescriptions against URTI (24). We thus believe that our  
5  
6 measures, even if imperfect, remain meaningful.  
7  
8  
9

### 10 *Limitations*

11  
12 In addition to measurement issues discussed above, certain limitations must be considered while interpreting our  
13  
14 results. Individuals covered by the public drug insurance plan are older and poorer than the provincial average  
15  
16 due to eligibility criteria(25). It seems unlikely that this would bias the association we found between chronic  
17  
18 diseases and compliant use because recommended antibiotics are basic medication covered regardless of  
19  
20 insurance plans and the province offers universal access to health care to all its citizens. Our regressions  
21  
22 adjusting for age and deprivation indexes gave results rather similar to bivariate regressions, suggesting little  
23  
24 impact on our results. Also, we measured compliance with guidelines when a diagnosis was available, but we  
25  
26 were unable to determine if antibiotics were necessary in the treatment of infections. High proportions of  
27  
28 infections treated with antibiotics are sometimes used as a signal of overuse, however, diagnostic codes are not  
29  
30 mandatory in medical claims and we could not assume that we had all infections, especially as untreated  
31  
32 infections might be coded less frequently. Indeed, a previous study reported good validity of diagnostic codes for  
33  
34 acute respiratory infections in Québec's medical claims database, but a sensitivity below 50%(26). Finally, the  
35  
36 association between chronic diseases and non-compliant use could be overestimated if diagnostic codes related  
37  
38 to chronic diseases were reported preferentially over codes for minor infections. Another study reported less  
39  
40 influenza-like illnesses in patients with chronic diseases, who nonetheless received more antibiotics(27). We did  
41  
42 not observe this trend in our data: data preparation for this project rather showed more infections per patient in  
43  
44 presence of chronic diseases.  
45  
46  
47

### 48 *Conclusion*

49  
50 Individuals with chronic diseases are slightly more exposed to antibiotic prescriptions that are not compliant  
51  
52 with provincial clinical guidelines and they also use more antimicrobials than the rest of the population. It is not  
53  
54 possible with our methodology to determine whether discordance is actually appropriate or not but, the high  
55  
56 frequency of non-compliant prescriptions in general suggests that there is room for improvement. Circumstances  
57  
58  
59  
60

1  
2 justifying a derogation to guidelines for primary care should be investigated. Further work should focus on  
3  
4 comorbidities that were not studied here and could explain extreme dosages, such as obesity and kidney failure.  
5  
6  
7

## 8 **References**

- 9  
10 1. Agence de santé publique du Canada. Plan d'action fédéral sur la résistance et le recours aux  
11 antimicrobiens au Canada: prolongement du cadre d'action fédéral [Internet]. Ottawa: Agence de santé  
12 publique du Canada; 2015. Available from: <https://www.deslibris.ca/ID/10046895>  
13
- 14 2. World Health Organization. Global action plan on antimicrobial resistance [Internet]. World Health  
15 Organization; 2016. Available from: <http://www.who.int/antimicrobial-resistance/global-action-plan/en/>  
16
- 17 3. The Expert Panel on the Potential Socio-Economic Impacts of Antimicrobial Resistance in Canada. When  
18 Antibiotics Fail [Internet]. 2019. Available from: <http://www.deslibris.ca/ID/10102747>  
19
- 20 4. Department of Health, Department of Agriculture, Water and the Environment. Australia's National  
21 Antimicrobial Resistance Strategy – 2020 and Beyond [Internet]. Canberra: Australian Government; p.  
22 18. Available from: [https://www.amr.gov.au/resources/australias-national-antimicrobial-resistance-](https://www.amr.gov.au/resources/australias-national-antimicrobial-resistance-strategy-2020-and-beyond)  
23 [strategy-2020-and-beyond](https://www.amr.gov.au/resources/australias-national-antimicrobial-resistance-strategy-2020-and-beyond)  
24
- 25 5. TATFAR. Transatlantic Taskforce on Antimicrobial Resistance (TATFAR) [Internet]. 2021. Available  
26 from: <https://www.cdc.gov/drugresistance/tatfar/index.html>  
27
- 28 6. World Health Organization. 10 global health issues to track in 2021 [Internet]. Available from:  
29 <https://www.who.int/news-room/spotlight/10-global-health-issues-to-track-in-2021>  
30
- 31 7. Public Health Agency of Canada. Canadian Antimicrobial Resistance Surveillance System Report - update  
32 2020. Ottawa; 2020 p. 108.  
33
- 34 8. Direction générale de la planification de la performance et de la qualité, Ministère de la Santé et des  
35 Services sociaux. Mise en oeuvre d'un programme de surveillance de l'usage des antibiotiques en  
36 établissement de santé. Ministère de la Santé et des Services sociaux; 2011.  
37
- 38 9. Conseil du médicament. Cadre de référence relatif à l'usage optimal des anti-infectieux et au suivi de  
39 l'utilisation de ces médicaments en milieu hospitalier. Québec; 2008 p. 80.  
40
- 41 10. INESSS. Guides d'usage optimal [Internet]. 2021. Available from: [https://www.inesss.qc.ca/outils-](https://www.inesss.qc.ca/outils-cliniques/outils-cliniques/outils-par-types/guides-dusage-optimal.html)  
42 [cliniques/outils-cliniques/outils-par-types/guides-dusage-optimal.html](https://www.inesss.qc.ca/outils-cliniques/outils-cliniques/outils-par-types/guides-dusage-optimal.html)  
43
- 44 11. European Centre for Disease Prevention and Control. Antimicrobial consumption database (ESAC-Net)  
45 [Internet]. Available from: [https://www.ecdc.europa.eu/en/antimicrobial-consumption/surveillance-and-](https://www.ecdc.europa.eu/en/antimicrobial-consumption/surveillance-and-disease-data/database)  
46 [disease-data/database](https://www.ecdc.europa.eu/en/antimicrobial-consumption/surveillance-and-disease-data/database)  
47
- 48 12. WHO Collaborating Centre for Drug Statistics Methodology. ATC/DDD Index 2017 [Internet]. 2017.  
49 Available from: [https://www.whocc.no/atc\\_ddd\\_index/](https://www.whocc.no/atc_ddd_index/)  
50
- 51 13. Blais C, Jean S, Sirois C, Rochette L, Plante C, Larocque I, et al. Quebec Integrated Chronic Disease  
52 Surveillance System (QICDSS), an innovative approach. *Chronic Dis Inj Can*. 2014 Nov;34(4):226–35.  
53  
54  
55  
56  
57

14. Nowakowska M, van Staa T, Mölter A, Ashcroft DM, Tsang JY, White A, et al. Antibiotic choice in UK general practice: rates and drivers of potentially inappropriate antibiotic prescribing. *J Antimicrob Chemother.* 2019 Nov 1;74(11):3371–8.
15. Wang Y, Bahar MA, Jansen AME, Kocks JWH, Alffenaar J-WC, Hak E, et al. Improving antibacterial prescribing safety in the management of COPD exacerbations: systematic review of observational and clinical studies on potential drug interactions associated with frequently prescribed antibacterials among COPD patients. *J Antimicrob Chemother.* 2019 Oct 1;74(10):2848–64.
16. Lefebvre F. Impact des maladies chroniques sur l'adhésion aux recommandations cliniques dans le traitement des infections urinaires. Université Laval; 2020. 60 p.
17. Statistics Canada. Overweight and obese adults, 2018 [Internet]. 2019. Available from: <https://www150.statcan.gc.ca/n1/pub/82-625-x/2019001/article/00005-eng.htm>
18. Roberts JA, Kruger P, Paterson DL, Lipman J. Antibiotic resistance—What's dosing got to do with it?: *Crit Care Med.* 2008 Aug;36(8):2433–40.
19. Llewelyn MJ, Fitzpatrick JM, Darwin E, SarahTonkin-Crine, Gorton C, Paul J, et al. The antibiotic course has had its day. *BMJ.* 2017 Jul 26;j3418.
20. Shulman ST, Bisno AL, Clegg HW, Gerber MA, Kaplan EL, Lee G, et al. Clinical Practice Guideline for the Diagnosis and Management of Group A Streptococcal Pharyngitis: 2012 Update by the Infectious Diseases Society of America. *Clin Infect Dis.* 2012 Nov 15;55(10):e86–102.
21. Bisno AL, Gerber MA, Kaplan JMG Jr, Edward L, Schwartz RH. Diagnosis and Management of Group A Streptococcal Pharyngitis: A Practice Guideline. *Clin Infect Dis.* 1997 Sep;25(3):574–83.
22. Smieszek T, Pouwels KB, Dolk FCK, Smith DRM, Hopkins S, Sharland M, et al. Potential for reducing inappropriate antibiotic prescribing in English primary care. *J Antimicrob Chemother.* 2018 Feb 1;73(suppl\_2):ii36-ii43.
23. Fleming-Dutra KE, Hersh AL, Shapiro DJ, Bartoces M, Enns EA, File TM, et al. Prevalence of Inappropriate Antibiotic Prescriptions Among US Ambulatory Care Visits, 2010–2011. *JAMA.* 2016 May 3;315(17):1864.
24. Cadieux G, Tamblyn R, Dauphinee D, Libman M. Predictors of inappropriate antibiotic prescribing among primary care physicians. *Can Med Assoc J.* 2007 Oct 9;177(8):877–83.
25. Régie de l'assurance-maladie du Québec. 2020. Available from: <https://www.ramq.gouv.qc.ca/en/citizens/prescription-drug-insurance/know-eligibility-conditions-public-plan>
26. Cadieux G, Tamblyn R. Accuracy of Physician Billing Claims for Identifying Acute Respiratory Infections in Primary Care. *Health Serv Res.* 2008 Dec;43(6):2223–38.
27. Bernardo CDO, Gonzalez-Chica D, Stocks N. Influenza-like illness and antimicrobial prescribing in Australian general practice from 2015 to 2017: a national longitudinal study using the MedicineInsight dataset. *BMJ Open.* 2019 Apr;9(4):e026396.

1  
2  
3  
4  
5  
6  
7  
8  
9  
10  
11  
12  
13  
14  
15  
16  
17  
18  
19  
20  
21  
22  
23  
24  
25  
26  
27  
28  
29  
30  
31  
32  
33  
34  
35  
36  
37  
38  
39  
40  
41  
42  
43  
44  
45  
46  
47

Table 1. Diagnostic codes used to identify infections targeted by provincial clinical guides.

| Infection                                                         | ICD-9 diagnostic codes                                                                               |
|-------------------------------------------------------------------|------------------------------------------------------------------------------------------------------|
| Bronchitis and chronic obstructive pulmonary disease exacerbation | 466 466.0 466.1 466.2 466.3 466.4 466.6 466.7 466.9<br>490 490.0 490.1 490.2 490.6 490.9             |
| Otitis media                                                      | 382 382.0 382.1 382.2 382.3 382.4 382.7 382.9                                                        |
| Pharyngitis                                                       | 340 341<br>462 462.0 462.1 462.4 462.9<br>463 463.0 463.2 463.8 463.9                                |
| Pneumonia                                                         | 481 481.0 481.1 481.9<br>482 482.9<br>485 485.0 485.9<br>486 486.0 486.4 486.5 486.9                 |
| Sinusitis                                                         | 461 461.0 461.1 461.2 461.3 461.4 461.5 461.6 461.8 461.9                                            |
| Upper respiratory tract infection                                 | 464 464.4 464.9 464.0 464.1 464.2 464.7<br>465 465.0 465.1 465.2 465.3 465.4 465.5 465.6 465.8 465.9 |

Table 2. Impact of the presence of chronic diseases on compliance of antibiotic prescriptions with provincial clinical guidelines for the treatment of respiratory infections in children, April 2010 to March 2017.

| Infection   | Category of chronic disease | Prescriptions* | Recommended antibiotic | Proportion ratio*         |                              |
|-------------|-----------------------------|----------------|------------------------|---------------------------|------------------------------|
|             |                             | N              | %                      | [95% confidence interval] |                              |
|             |                             |                |                        | Unadjusted                | Adjusted                     |
| Otitis      | None of the following       | 167,066        | 97.9                   | ref.                      | ref.                         |
|             | Diabetes                    | 265            | 97.7                   | 1.003 [0.983 ; 1.023]     | 1.003 [0.984 ; 1.023]        |
|             | Mental health disorder      | 14,995         | 97.7                   | 0.999 [0.996 ; 1.001]     | 0.998 [0.995 ; 1.001]        |
|             | Respiratory disease         | 19,300         | 97.4                   | 0.996 [0.993 ; 0.999]     | <b>0.997 [0.994 ; 1.000]</b> |
| Pharyngitis | None of the following       | 86,131         | 90.6                   | ref.                      | ref.                         |
|             | Diabetes                    | 180            | 89.4                   | 0.995 [0.947 ; 1.046]     | 0.992 [0.945 ; 1.043]        |
|             | Mental health disorder      | 9,497          | 88.7                   | 0.984 [0.976 ; 0.991]     | <b>0.986 [0.979 ; 0.994]</b> |
|             | Respiratory disease         | 14,558         | 88.4                   | 0.978 [0.972 ; 0.985]     | <b>0.978 [0.971 ; 0.985]</b> |
| Pneumonia   | None of the following       | 25,240         | 90.1                   | ref.                      | ref.                         |
|             | Diabetes                    | 55             | 87.3                   | 0.965 [0.871 ; 1.069]     | 0.966 [0.873 ; 1.069]        |
|             | Mental health disorder      | 2,771          | 89.8                   | 0.996 [0.983 ; 1.009]     | 0.994 [0.981 ; 1.007]        |
|             | Respiratory disease         | 5,132          | 88.9                   | 0.981 [0.971 ; 0.992]     | <b>0.978 [0.967 ; 0.989]</b> |
| Sinusitis   | None of the following       | 10,410         | 93.6                   | ref.                      | ref.                         |
|             | Diabetes                    | 41             | 97.6                   | 1.054 [1.004 ; 1.108]     | <b>1.056 [1.004 ; 1.110]</b> |
|             | Mental health disorder      | 1,958          | 92.5                   | 1.000 [0.986 ; 1.014]     | 0.999 [0.985 ; 1.014]        |
|             | Respiratory disease         | 2,814          | 90.2                   | 0.964 [0.951 ; 0.977]     | <b>0.970 [0.957 ; 0.984]</b> |

1  
2  
3  
4  
5  
6  
7  
8  
9  
10  
11  
12  
13  
14  
15  
16  
17  
18  
19  
20  
21  
22  
23  
24  
25  
26  
27  
28  
29  
30  
31  
32  
33  
34  
35  
36  
37  
38  
39  
40  
41  
42  
43  
44  
45  
46  
47

\*Categories of chronic diseases are not mutually exclusive, so unadjusted proportion ratios are actually adjusted for the other categories of chronic diseases. The adjusted regressions were also adjusted for year, age group, sex, geographical zone and quintiles of deprivation. The total number of prescriptions is not equal to the sum of prescriptions for each chronic disease category.

Table 3. Impact of the presence of chronic diseases on compliance of antibiotic prescriptions with provincial clinical guidelines for the treatment of respiratory infections in adults, April 2010 to March 2017.

| Infection                         | Category of chronic disease | Prescriptions * |                          | Prescriptions with a dosage |                                     | Proportion ratio*     |                                    |
|-----------------------------------|-----------------------------|-----------------|--------------------------|-----------------------------|-------------------------------------|-----------------------|------------------------------------|
|                                   |                             | N               | Recommended antibiotic % | N                           | Recommended antibiotic and dosage % | Unadjusted            | Adjusted [95% confidence interval] |
| COPD exacerbations and bronchitis | COPD only                   | 24,576          | 94.5                     | 24,564                      | 33.3                                | ref.                  | ref.                               |
|                                   | Diabetes                    | 38,398          | 91.9                     | 38,355                      | 31.4                                | 0.963 [0.944 ; 0.982] | <b>0.951 [0.933 ; 0.970]</b>       |
|                                   | Mental health disorder      | 31,629          | 92.1                     | 31,596                      | 32.8                                | 1.017 [0.997 ; 1.037] | 1.012 [0.992 ; 1.032]              |
|                                   | Cardiovascular disease      | 101,208         | 92.1                     | 101,097                     | 32.2                                | 0.987 [0.968 ; 1.007] | 0.987 [0.967 ; 1.008]              |
| Pharyngitis                       | None of the following       | 74,188          | 63.5                     | 74,123                      | 50.6                                | ref.                  | ref.                               |
|                                   | Diabetes                    | 8,736           | 53.1                     | 8,725                       | 42.0                                | 0.942 [0.916 ; 0.969] | 0.978 [0.951 ; 1.006]              |
|                                   | Mental health disorder      | 21,273          | 60.5                     | 21,241                      | 47.0                                | 0.976 [0.960 ; 0.992] | <b>0.976 [0.960 ; 0.991]</b>       |
|                                   | Cardiovascular disease      | 21,719          | 52.8                     | 21,699                      | 41.3                                | 0.851 [0.835 ; 0.867] | <b>0.955 [0.934 ; 0.976]</b>       |

|           |                        |        |      |        |      |                       |                              |
|-----------|------------------------|--------|------|--------|------|-----------------------|------------------------------|
|           | Respiratory disease    | 22,563 | 59.2 | 22,536 | 44.7 | 0.932 [0.917 ; 0.948] | <b>0.939 [0.924 ; 0.955]</b> |
| Pneumonia | None of the following  | 23,971 | 83.9 | 23,933 | 40.3 | ref.                  | ref.                         |
|           | Diabetes               | 26,245 | 73.4 | 26,112 | 37.6 | 0.970 [0.952 ; 0.989] | <b>0.963 [0.945 ; 0.982]</b> |
|           | Mental health disorder | 26,515 | 73.4 | 26,429 | 36.5 | 0.935 [0.917 ; 0.953] | <b>0.938 [0.921 ; 0.956]</b> |
|           | Cardiovascular disease | 71,019 | 74.0 | 70,731 | 38.5 | 0.991 [0.975 ; 1.007] | <b>0.960 [0.942 ; 0.977]</b> |
|           | Respiratory disease    | 51,273 | 74.2 | 50,992 | 37.5 | 0.938 [0.923 ; 0.953] | <b>0.938 [0.923 ; 0.953]</b> |
| Sinusitis | None of the following  | 53,750 | 86.4 | 53,728 | 60.8 | ref.                  | ref.                         |
|           | Diabetes               | 15,959 | 82.4 | 15,941 | 52.3 | 0.960 [0.944 ; 0.977] | <b>0.966 [0.950 ; 0.983]</b> |
|           | Mental health disorder | 27,540 | 83.2 | 27,522 | 55.0 | 0.960 [0.948 ; 0.972] | <b>0.953 [0.941 ; 0.965]</b> |
|           | Cardiovascular disease | 50,174 | 82.7 | 50,139 | 52.5 | 0.895 [0.885 ; 0.905] | <b>0.944 [0.932 ; 0.957]</b> |
|           | Respiratory disease    | 36,744 | 83.5 | 36,716 | 54.3 | 0.959 [0.948 ; 0.970] | <b>0.960 [0.949 ; 0.971]</b> |

\*Categories of chronic diseases are not mutually exclusive, so unadjusted proportion ratios are actually adjusted for the other categories of chronic diseases. The adjusted regressions were also adjusted for year, age group, sex, geographical zone and quintiles of deprivation. The total number of prescriptions is not equal to the sum of prescriptions for each chronic disease category.
